# Crystal-Storing Histiocytosis in Bone Marrow

## A Clinicopathologic Study of Eight Cases and Review of the Literature

Hong Fang, MD, April Chiu, MD, and Kaaren K. Reichard, MD

From the Department of Laboratory Medicine and Pathology, Division of Hematopathology, Mayo Clinic, Rochester, MN.

**Key Words:** Crystal-storing histiocytosis; Bone marrow; Lymphoproliferative; Plasma cell; Myeloma

*Am J Clin Pathol* February 2018;149:148-163

DOI: 10.1093/AJCP/AQX150

### ABSTRACT

**Objectives:** We report the clinicopathologic characteristics of eight cases of crystal-storing histiocytosis (CSH) with bone marrow (BM) involvement (BM-CSH) and review CSH cases published in the English literature.

**Methods:** We queried our pathology database for BM cases with CSH mentioned in the final diagnosis/comments from June 2011 to August 2016.

**Results:** Eight cases of BM-CSH were identified. The underlying diagnoses consisted predominantly of plasma cell disorders (88%) associated with monocytic  $\kappa$  light chain. In BM aspirates, crystals within histiocytes exhibited a morphologic spectrum including brightly eosinophilic, needle-like, or globule-like. In BM core biopsies, the histiocytes were often in aggregates with intracellular needle-like and/or globular, refractile inclusions.

**Conclusions:** BM-CSH is a rare phenomenon and exhibits a heterogeneous crystalline and histiocytic appearance warranting accurate recognition to avoid misinterpretation of a granulomatous condition or storage disorder. In addition, prompt assessment for an underlying B-cell lymphoma or clonal plasmacytic neoplasm is indicated.

Crystal-storing histiocytosis (CSH) is a rare disorder characterized by the accumulation of nonneoplastic histiocytes containing intracytoplasmic refractile eosinophilic crystals, representing most often a lysosomal accumulation of crystallized immunoglobulin (Ig). In the vast majority of CSH cases (90%), there is an associated underlying lymphoproliferative or plasma cell disorder, particularly plasma cell myeloma (PCM), marginal zone lymphoma, lymphoplasmacytic lymphoma, and monoclonal gammopathy of undetermined significance.<sup>1</sup> In the remaining 10% of cases, CSH is associated with other conditions, including Fanconi syndrome, autoimmune disorders (eg, rheumatoid arthritis, eosinophilic colitis, and systemic mastocytosis), reactive inflammatory conditions, metabolic disorders, and drugs (eg, clofazimine).<sup>1-3</sup> The intracytoplasmic crystals are composed of Ig light and/or heavy chain fragments enriched in Ig variable regions, as recently demonstrated by mass spectrometry.<sup>4</sup> The vast majority of the neoplasms are  $\kappa$  light chain restricted without any specific heavy chain association.<sup>1</sup> Some variants of intracytoplasmic crystals have also been reported, including clofazimine crystals in clofazimine-induced CSH among lepromatous leprosy patients,<sup>5-8</sup> Charcot-Leyden crystals,<sup>9,10</sup> and amyloid deposition.<sup>11</sup>

CSH may involve a wide variety of tissue sites, including bone marrow (BM), lymph nodes, liver, spleen, lungs, gastrointestinal tract, kidney, central nerve system, and skin. It may present as either localized (a single deposit involving only one organ or site) or generalized (multiple deposits involving more than one organ or site) forms.

While BM involvement is common in generalized CSH, isolated BM involvement does also rarely occur (~11% of cases).<sup>1</sup> The presence of crystal-laden histiocytes in BM specimens involved by CSH (BM-CSH) often poses a diagnostic dilemma, as they may mimic other types of histiocytic proliferations (eg, Gaucher cells and granulomatous inflammation) and neoplastic conditions (eg, rhabdomyoma and renal cell carcinoma).

Given the rarity of a diagnosis of BM-CSH, variable clinical presentations, potential for histologic misinterpretation, and relative paucity of published literature on this topic, we sought to describe the clinicopathologic features of BM-CSH cases in order to raise recognition of the diverse morphologic appearances and to promote early diagnosis for optimal patient management. In addition, we compared our findings with and reviewed the published literature on CSH that is not just restricted to BM involvement.

## Materials and Methods

### Case Selection and Data Retrieval

The study was approved by our institutional review board. BM cases diagnosed as CSH were retrieved from the files of Mayo Clinic Rochester Department of Laboratory Medicine and Pathology during the period from June 2011 to August 2016. One additional case was seen in consultation.

### Clinical and Laboratory Data

Key clinical and laboratory data abstracted from the medical record included patient age, gender, clinical presentation, history of prior neoplasm, serum protein studies, organ(s) involved by CSH, cytogenetic and fluorescence in situ hybridization results, and clinical course including follow-up duration and survival time.

### Bone Marrow Specimens

Bone marrow aspirate smears were stained with a Wright-Giemsa preparation. Bone marrow core biopsies were fixed in B5 fixative, rinsed with 10% neutral buffered formalin, and subjected to limited decalcification in RDO Gold Working Solution (Apex Engineering, Aurora, IL) prior to routine processing.

### Morphologic Review

Diagnoses of the underlying neoplastic process were established according to the 2016 revision of World

Health Organization classification criteria using a combination of morphologic, immunophenotypic, and/or molecular findings.<sup>12</sup> All peripheral blood smears, BM aspirates, and trephine biopsies were reviewed by two experienced hematopathologists (K.K.R. and A.C.). Cytologic appearances/characteristics of the cytoplasmic inclusions in histiocytes on both the aspirate smears and core biopsies were recorded.

### Immunohistochemistry and In Situ Hybridization Studies

Immunohistochemical analysis was performed on 3 to 4  $\mu$ m thick, formalin-fixed, paraffin-embedded sections in certain cases to assess plasma cell quantity and clonality (cases 1-5) and to elucidate the crystalline-containing histiocytes (cases 1, 2, 4-6). Primary antibodies included CD138 (MI15, Dako, Carpinteria, CA),  $\kappa$  (Dako), and  $\lambda$  (Dako) for plasma cells. Antibodies to highlight the histiocytes included CD68 (PG-M1, Leica Biosystems, Wetzlar, Germany) and/or CD163 (10D6, Leica Biosystems). In situ hybridization for  $\kappa$  and  $\lambda$  (Ventana Medical Systems, Tucson, AZ) was done on cases 1 to 4 and 6 to assess  $\kappa$  and  $\lambda$  clonality in the plasmacytic infiltrate.

### Literature Search

A PubMed search of the English literature was performed using keyword “crystal-storing histiocytosis” in either title or abstract, and relevant publications were identified from 1987 to 2017.

## Results

### Clinical Features

Approximately 27,200 bone marrows were performed during the time frame from June 2011 and August 2016. Of the 27,200, approximately 10,880 were performed to evaluate for plasma cell dyscrasia, based on clinical, laboratory and/or radiologic findings. Of these 10,880 plasma cell bone marrow cases, approximately 2,176 were initial diagnostic evaluations. Seven cases meeting the search criteria for CSH were identified (0.2%). One additional case was seen in consultation. The patients included 7 men and 1 woman with an average age at diagnosis of 62 years (range, 40-73 years).

In six of the eight cases, the CSH was diagnosed concurrently with the underlying plasmacytic disorder (cases 2, 4-8). Case 1 was first seen at our institution 5 years after the original reported diagnosis (original diagnostic material not available to us for review), so it

Table 1  
Clinical Characteristics of Eight Cases of BM-CSH

| Case No. | Age (y)/ Sex | Symptoms Prompting Workup                              | Prior Neoplasms | Underlying Diagnosis              | Acute Renal Failure | Serum Paraprotein Level (g/dL) | Monoclonal Immunoglobulin Type | Site(s) Involved by CSH      | CSH Diagnosis Prior, Concurrent, or Subsequent to BM Clonal Disorder Diagnosis | Clinical Course:                                                                              |
|----------|--------------|--------------------------------------------------------|-----------------|-----------------------------------|---------------------|--------------------------------|--------------------------------|------------------------------|--------------------------------------------------------------------------------|-----------------------------------------------------------------------------------------------|
| 1        | 63/M         | Persistent shoulder pain                               | No              | Low-grade B-cell lymphoma         | No                  | 0.9                            | IgM K                          | BM                           | Unknown <sup>a</sup>                                                           | Alive, 17 mo; persistent coexistent CSH and lymphoma; S/P chemotherapy                        |
| 2        | 40/M         | Severe headache and hypertension                       | No              | Systemic amyloidosis with myeloma | No                  | NA                             | No apparent monoclonal protein | BM                           | Concurrent                                                                     | Alive, 17 mo; persistent coexistent CSH and amyloidosis; S/P chemotherapy and PBSCT           |
| 3        | 71/M         | Elevated total protein                                 | No              | PCM                               | Yes                 | 2.6                            | IgG K                          | BM, eye/orbit                | Subsequent (37 months after myeloma diagnosis)                                 | Died, 1 mo after diagnosis of CSH and relapsed myeloma                                        |
| 4        | 65/F         | Thrombocytopenia, splenomegaly, and osteolytic lesions | No              | PCM                               | No                  | 3.1                            | IgA K                          | BM                           | Concurrent                                                                     | Alive, 88 mo; persistent coexistent CSH and myeloma (10%); S/P chemotherapy and PBSCT         |
| 5        | 55/M         | Progressing fatigue                                    | No              | MGUS                              | No                  | 0.7                            | IgG K                          | BM, skin, liver <sup>b</sup> | Concurrent                                                                     | Alive, 10 mo; persistent coexistent CSH and MGUS; S/P excision of skin lesions                |
| 6        | 70/M         | Nausea, vomiting, and abdominal pain                   | No              | PCM                               | No                  | 1.2                            | IgG K                          | BM, omentum                  | Concurrent                                                                     | Alive, 41 mo; persistent coexistent CSH and residual myeloma (5%); S/P chemotherapy and PBSCT |
| 7        | 73/M         | Unknown                                                | Unknown         | MGUS                              | Unknown             | Unknown                        | IgG K                          | BM                           | Concurrent                                                                     | Unknown                                                                                       |
| 8        | 56/M         | Renal failure and anemia                               | No              | PCM                               | Yes                 | 1.1                            | IgG K                          | BM                           | Concurrent                                                                     | Alive, 3 mo; limited follow-up due to recent diagnosis and care at different institution      |

BM, bone marrow; CSH, crystal-storing histiocytosis; Ig, immunoglobulin; MGUS, monoclonal gammopathy of uncertain significance; PBSCT, peripheral blood stem cell transplant; PCM, plasma cell myeloma; S/P, status post.  
<sup>a</sup> Original diagnostic material 5 years prior was not available for our review.  
<sup>b</sup> Foreign body granuloma-associated CSH instead of an Ig-related CSH.



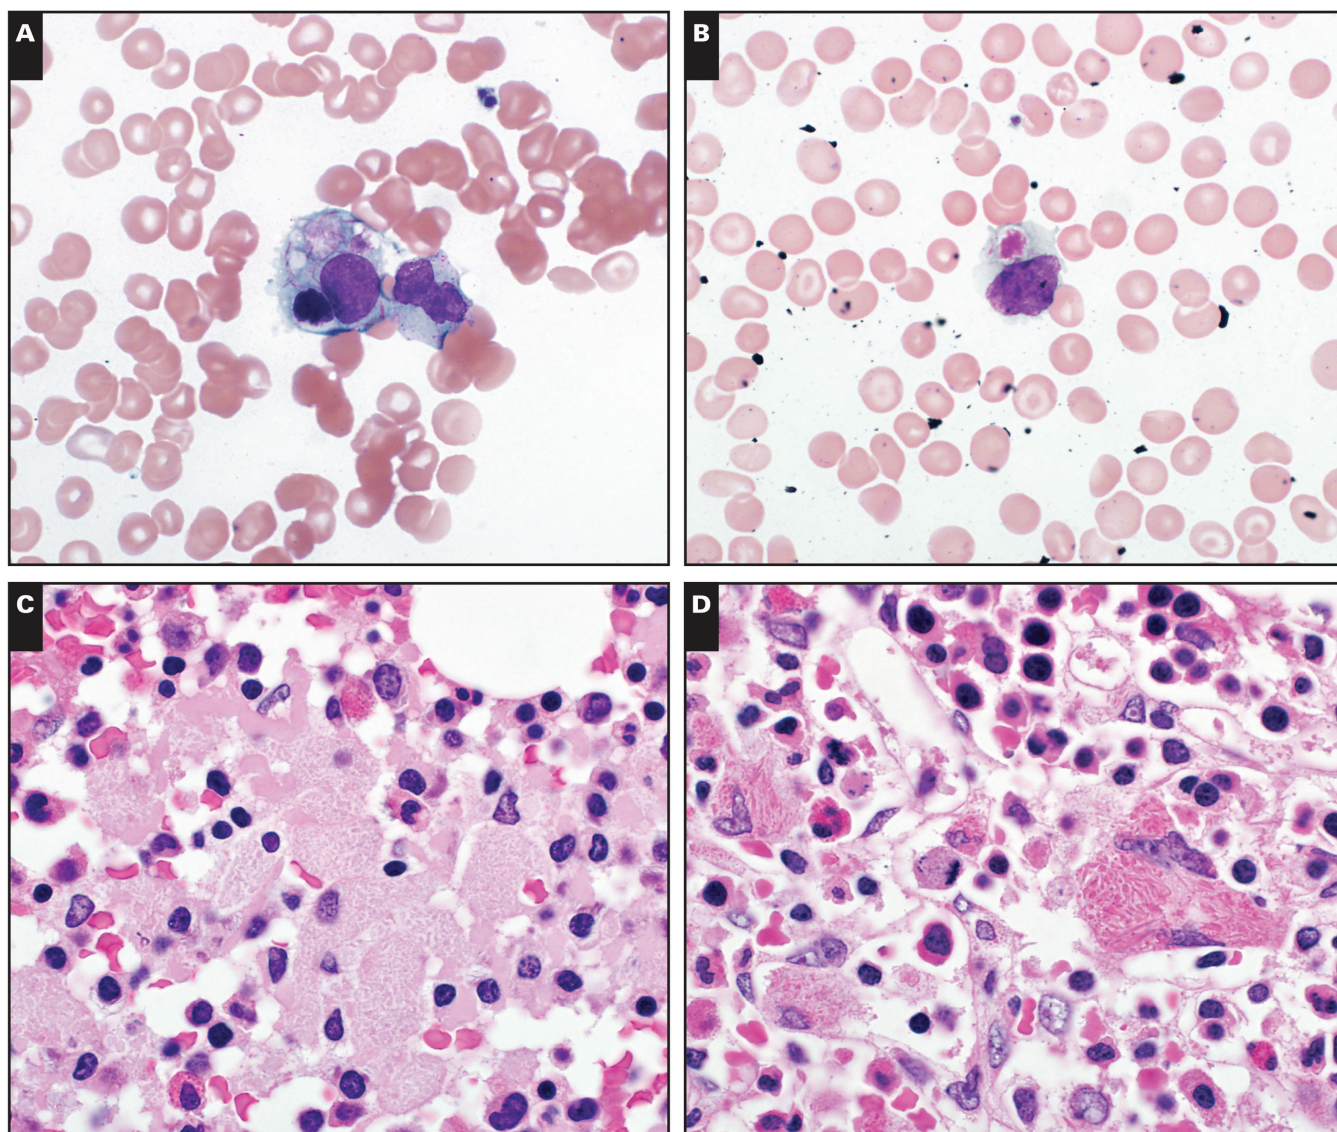

**Image 1** Crystal-storing histiocytosis associated with low-grade B-cell lymphoma. The histiocytes contained slender needle-like (A, Wright-Giemsa, x1,000) or globular (B, Wright-Giemsa, x1,000) crystals. In the biopsy the histiocyte cytoplasm was lightly eosinophilic (C, H&E, x1,000) with occasional intracytoplasmic globular crystals (D, H&E, x1,000).

is not clear if CSH was present from the onset of disease or developed later in the disease course. Case 3 carried a diagnosis of PCM for 3 years prior to the development of CSH in association with his myeloma. The underlying diagnoses in the 8 BM-CSH cases consisted predominantly of plasma cell disorders including monoclonal gammopathy of undetermined significance (two cases), PCM (four cases), low-grade B-cell lymphoma (one case), and primary systemic amyloidosis associated with PCM (one case). All seven patients with available history had no prior other neoplasms.

All four PCM cases presented with typical myeloma symptoms including osteolytic lesions, acute renal failure, anemia, or elevated serum proteins (cases 3, 4, 6, and 8)

**Table 1.** Two cases of renal failure were noted at presentation (cases 3 and 8). Two cases had history of splenomegaly but without any evidence of biopsy-proven CSH (cases 1 and 4). Case 1 had splenomegaly attributable to his lymphoma. Splenectomy, in addition to chemotherapy, had been part of his clinical treatment. Case 4 carried a prior diagnosis of immune thrombocytopenia and splenectomy had been part of the treatment regimen. Case 1 showed a very small  $\kappa$  light chain restricted B-cell population by splenic flow cytometry. Five cases (cases 1, 2, 4, 7, and 8) had localized BM involvement, while the remaining three had generalized involvement including BM, eye/orbit, skin, liver, and omentum. Case 2 was shown to have amyloid AL ( $\kappa$ )-type by mass spectrometry. All cases were



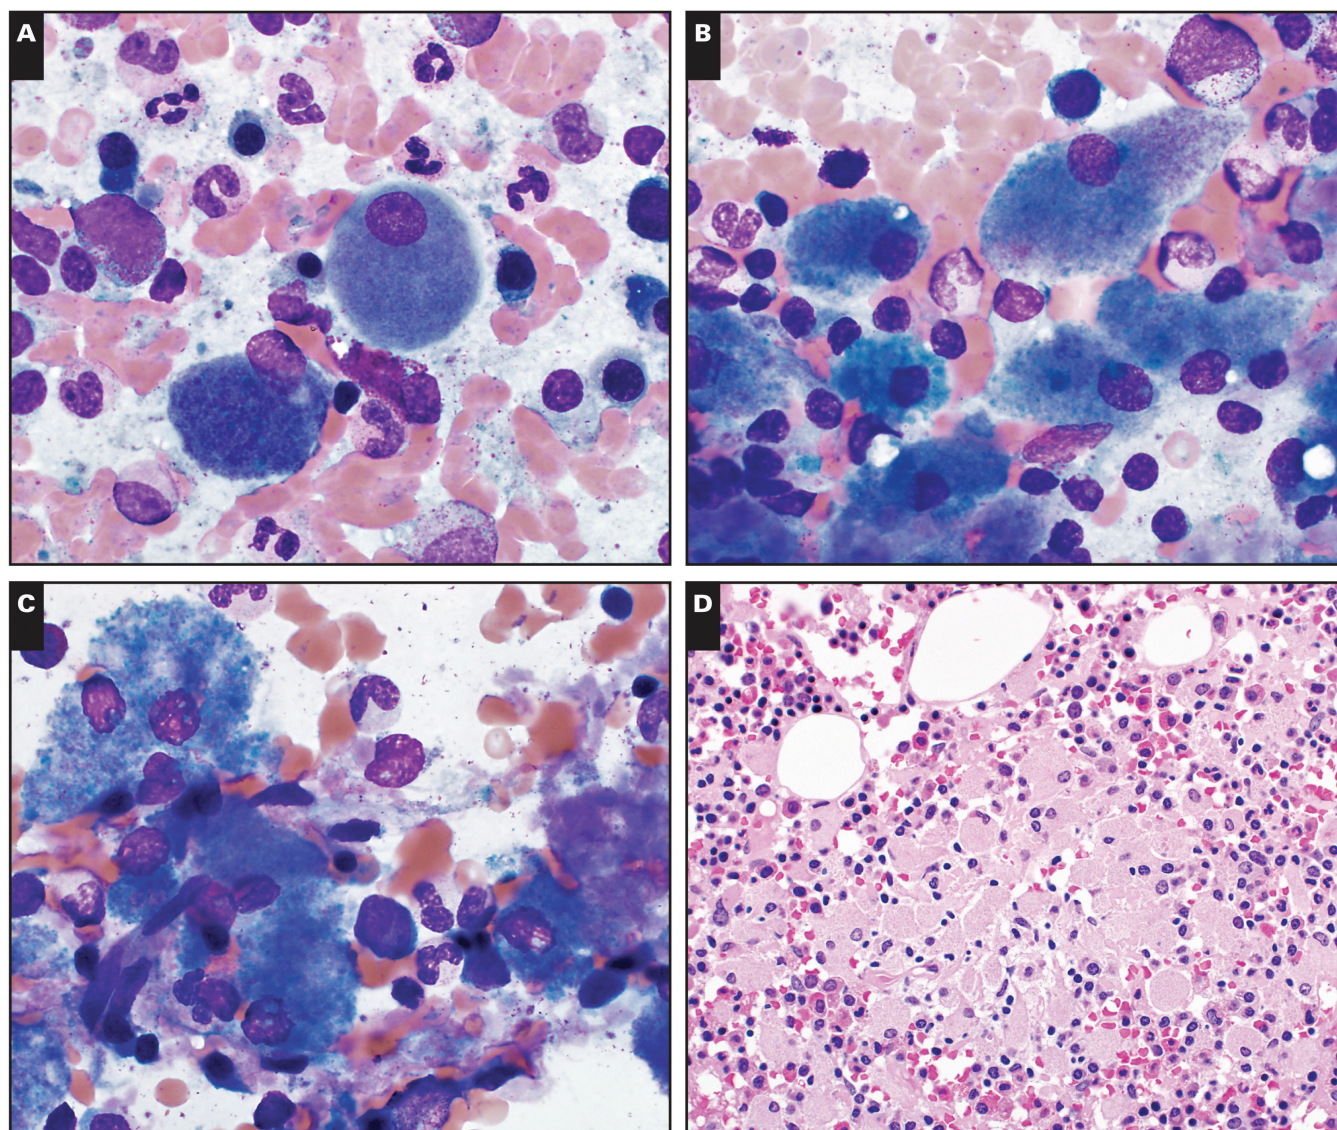

**Image 2** Crystal-storing histiocytosis associated with amyloidosis and plasma cell myeloma. The histiocytes had gray-blue, finely granular cytoplasm and occasionally mimicked dysplastic small monolobated megakaryocytes (**A**, Wright-Giemsa, x1,000), or resembled sea blue histiocytes (**B**, Wright-Giemsa, x1,000). Amyloid material was seen both within the cytoplasm of the histiocytes and extracellularly (**C**, Wright-Giemsa, x1,000). In the biopsy the histiocytic infiltrate imparted a granulomatous appearance (**D**, H&E, x600).

associated with monoclonal  $\kappa$  light chain without association of any specific heavy chain.

Six of the seven patients were alive during the follow-up. All five cases with available follow-up biopsies showed persistent CSH after either chemotherapy or bone marrow transplantation. The patient of case 3 was followed for approximately 3 years since his diagnosis of PCM and died 1 month after CSH was identified by BM biopsy. This patient also carried a diagnosis of monoclonal gammopathy crystalline keratopathy since his initial diagnosis of PCM.

### Pathologic Features

In BM aspirate smears, the crystals/crystalline inclusions within histiocytes showed a spectrum of appearances including brightly eosinophilic, needle-like, or globule-like forms **Image 1**, **Image 2**, **Image 3**, **Image 4**, **Image 5**, and **Image 6**. The cytoplasm of histiocytes could be lightly azurophilic, gray-blue, sea-blue, finely granular, lightly globular, or Gaucher-like (**Image 6**) **Table 2**. The histiocytes in case 2 mimicked dysplastic small monolobated megakaryocytes (**Image 2A**). Some of these histiocytes had sea blue cytoplasm with occasional globules while some others had



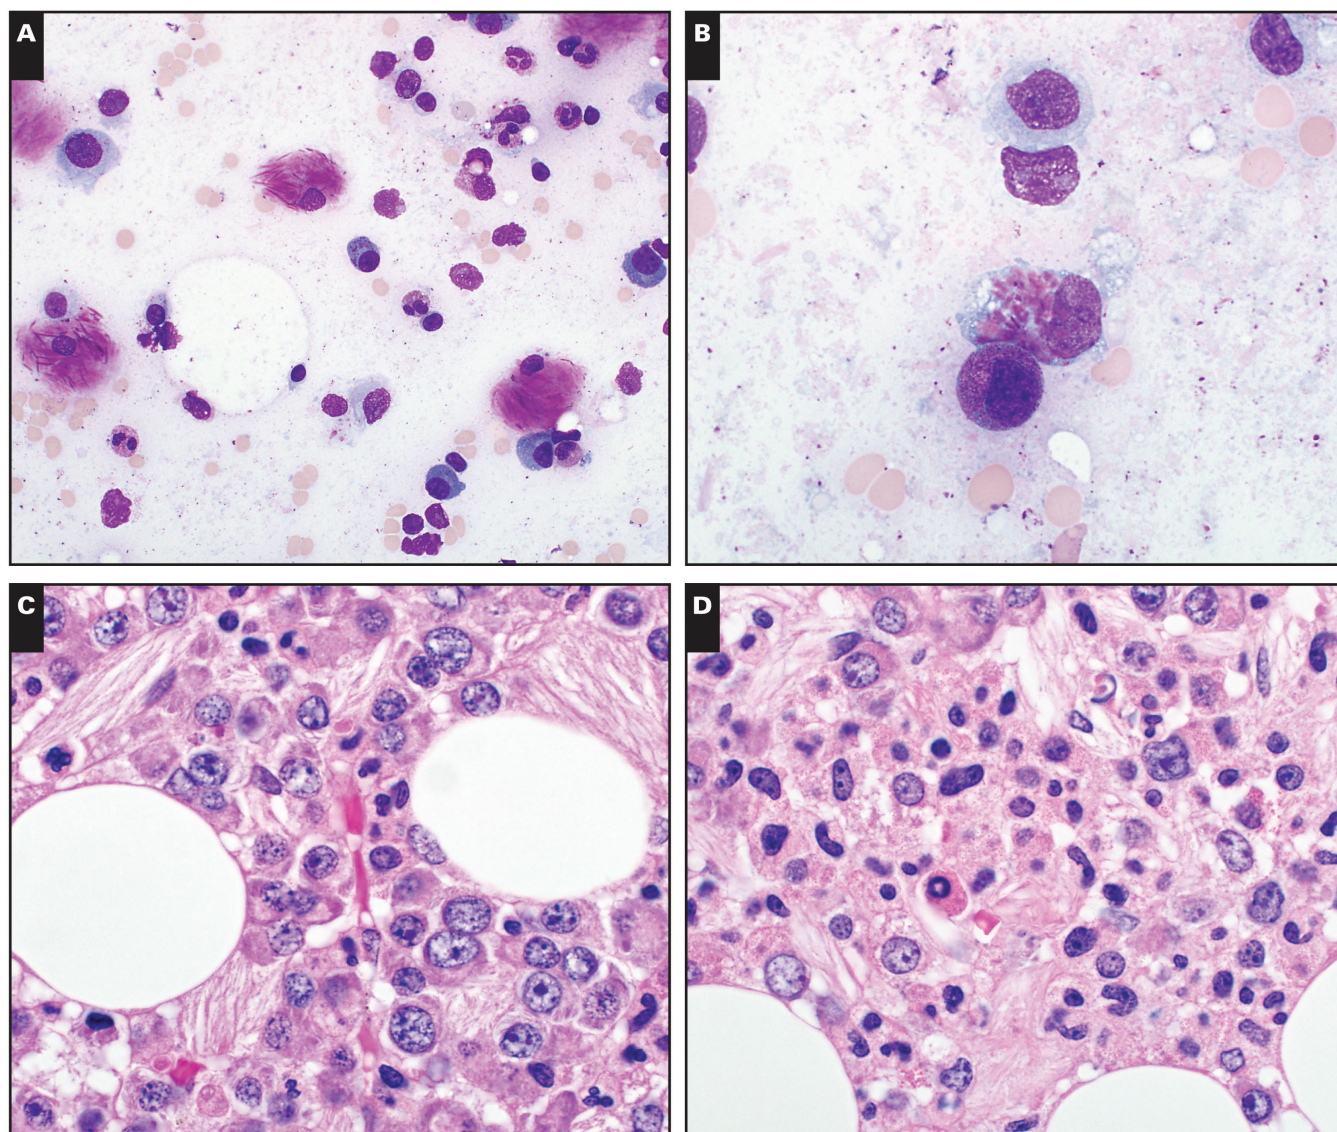

**Image 3** Crystal-storing histiocytosis associated with plasma cell myeloma. The crystals were brightly eosinophilic and long and needle-like (**A**, Wright-Giemsa, x600) or globular (**B**, Wright-Giemsa, x1,000). In the biopsy the histiocytes were Gaucher-like with striated cytoplasm (**C**, H&E, x1,000) and rare globules (**D**, H&E, x1,000).

light purple cytoplasm with amyloid inclusions (**Image 2C**). In contrast, the histiocytes in case 3 showed brightly eosinophilic cytoplasm with numerous Auer rod-like inclusions resembling the cells seen in acute promyelocytic leukemia (APL), while some adjacent plasma cells contained large granular lymphocytic-like granules (**Image 3A**).

In the BM core biopsies, the histiocytes were often in aggregates, but occasionally singly distributed, with a Gaucher-like appearance on H&E with striated light pink cytoplasm and/or visible intracellular needle-like and globular, refractile inclusions (**Images 3C** and **3D**; **Table 2**). Some histiocytic infiltrates imparted a granulomatous appearance (**Image 2D**). Case 4 showed strikingly pink histiocytes with hexagonal like crystals in biopsy (**Image 4D**).

In this case, the plasma cells had globule-like crystals, numerous small chunky granules, or APL-like cell appearance (**Images 4A-4C**). The percentages of histiocytes ranged from less than 10 to well over 30 (**Table 2**). Case 6 demonstrated Pseudo-Gaucher histiocytes on the aspirate smear (**Image 6B**) while epithelioid like infiltrates were seen on the core biopsy (**Images 6C** and **6D**).

### Immunophenotypic Features

Plasma cell clonality was proven in all cases by either immunohistochemistry (cases 1-5), in situ hybridization (cases 1-4, 6) and/or flow cytometry (cases 1, 2, 3, 7, and 8) using  $\kappa$  and  $\lambda$ . In case 1, the clonal lymphoplasmacytic infiltrate was elucidated by flow cytometric immunophenotyping.



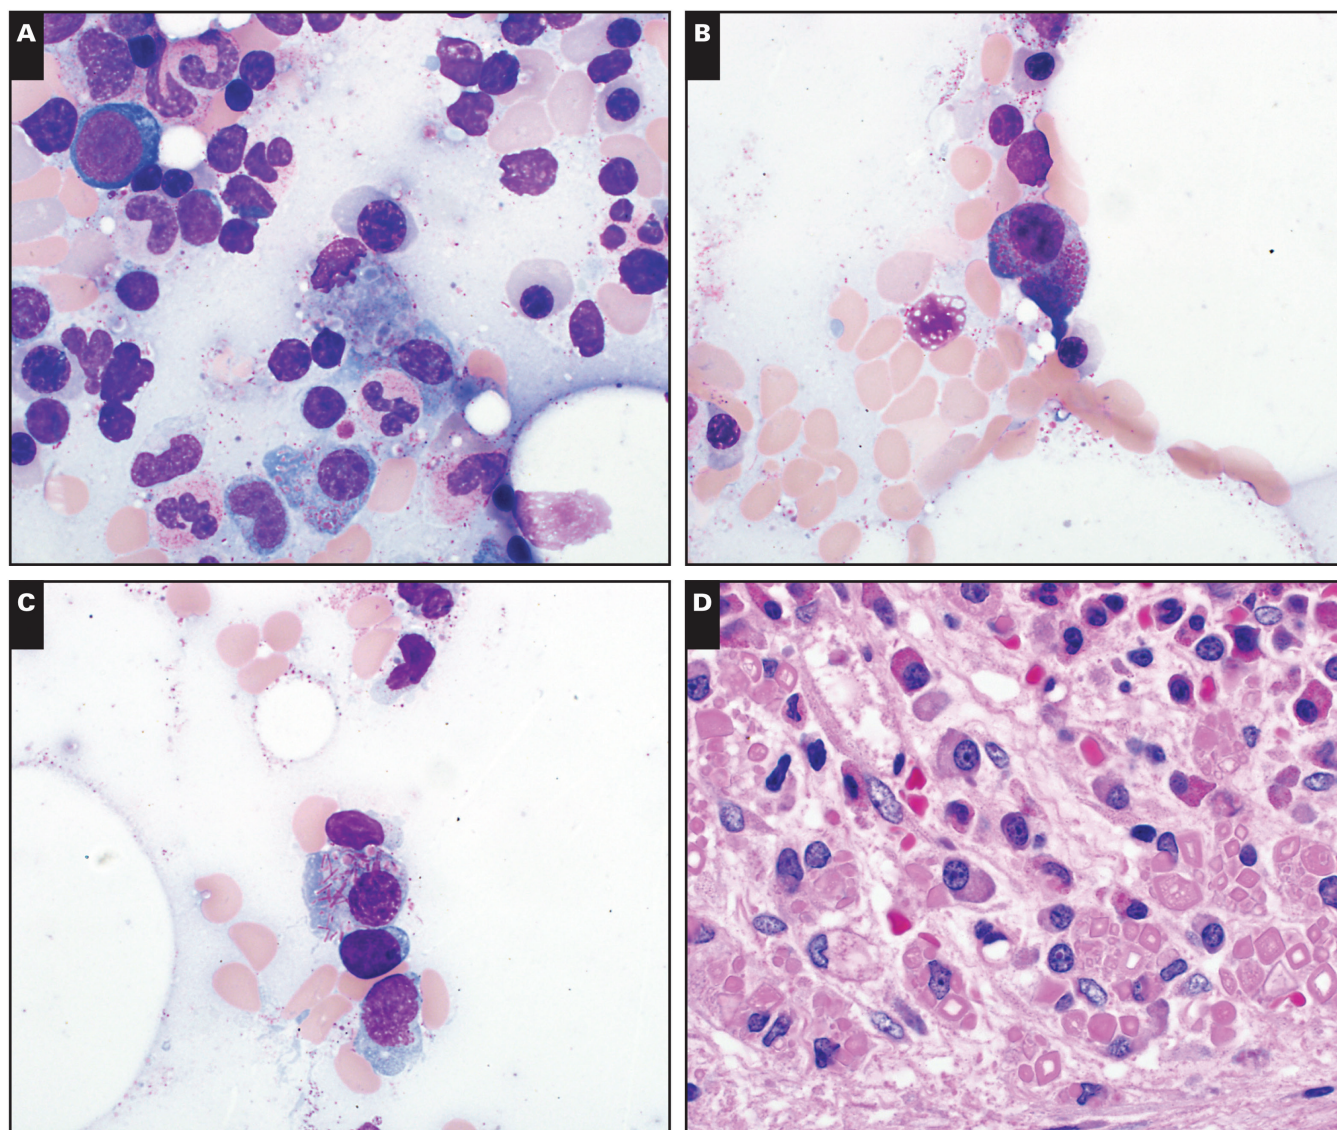

**Image 4** Crystal-storing histiocytosis associated with plasma cell myeloma. The histiocytes had lightly globular cytoplasm (**A**, Wright-Giemsa, x1,000). Plasma cells had globular-like crystals (**A**), numerous small chunky granules (**B**, Wright-Giemsa, x1,000), or faggot cell appearance (**C**, Wright-Giemsa, x1,000). The biopsy showed strikingly pink histiocytes with hexagonal like crystals (**D**, H&E, x1,000).

None of the cases that had immunohistochemistry and in situ hybridization concurrently performed had a perceptible difference in the ability of the staining to detect and demonstrate plasma cell clonality **Image 7**.

### Literature Review

One hundred twenty-three cases of CSH were identified through a PubMed search of the literature from 1987 to 2017. Including our eight cases, there is a total of 131. One hundred of 131 cases (76%) are associated with an underlying lymphoproliferative, or plasma cell disorder **Table 3**.<sup>4,13-71</sup> The remaining 31 cases include clofazimine-related CSH (four cases), associated with other

hematologic-related diseases (two cases: plasma cell granuloma and systemic mastocytosis), or without evidence of association with any other diseases.<sup>1-3,5-11,57,72-90</sup> The average age of patients with CSH and an underlying lymphoproliferative or plasma cell disorder is 60 years (range, 18-91 years) with a nearly equal male:female distribution (51:45) (three cases unknown). BM was the most common site of involvement, followed by lung/pleura, kidney, lymph node, gastrointestinal tract, head, and neck. Most cases (82%) had only one confirmed site of involvement **Table 4**. The average age of patients with CSH without an underlying lymphoproliferative or plasma cell disorder is 54 years (range, 19-80 years) with a nearly equal



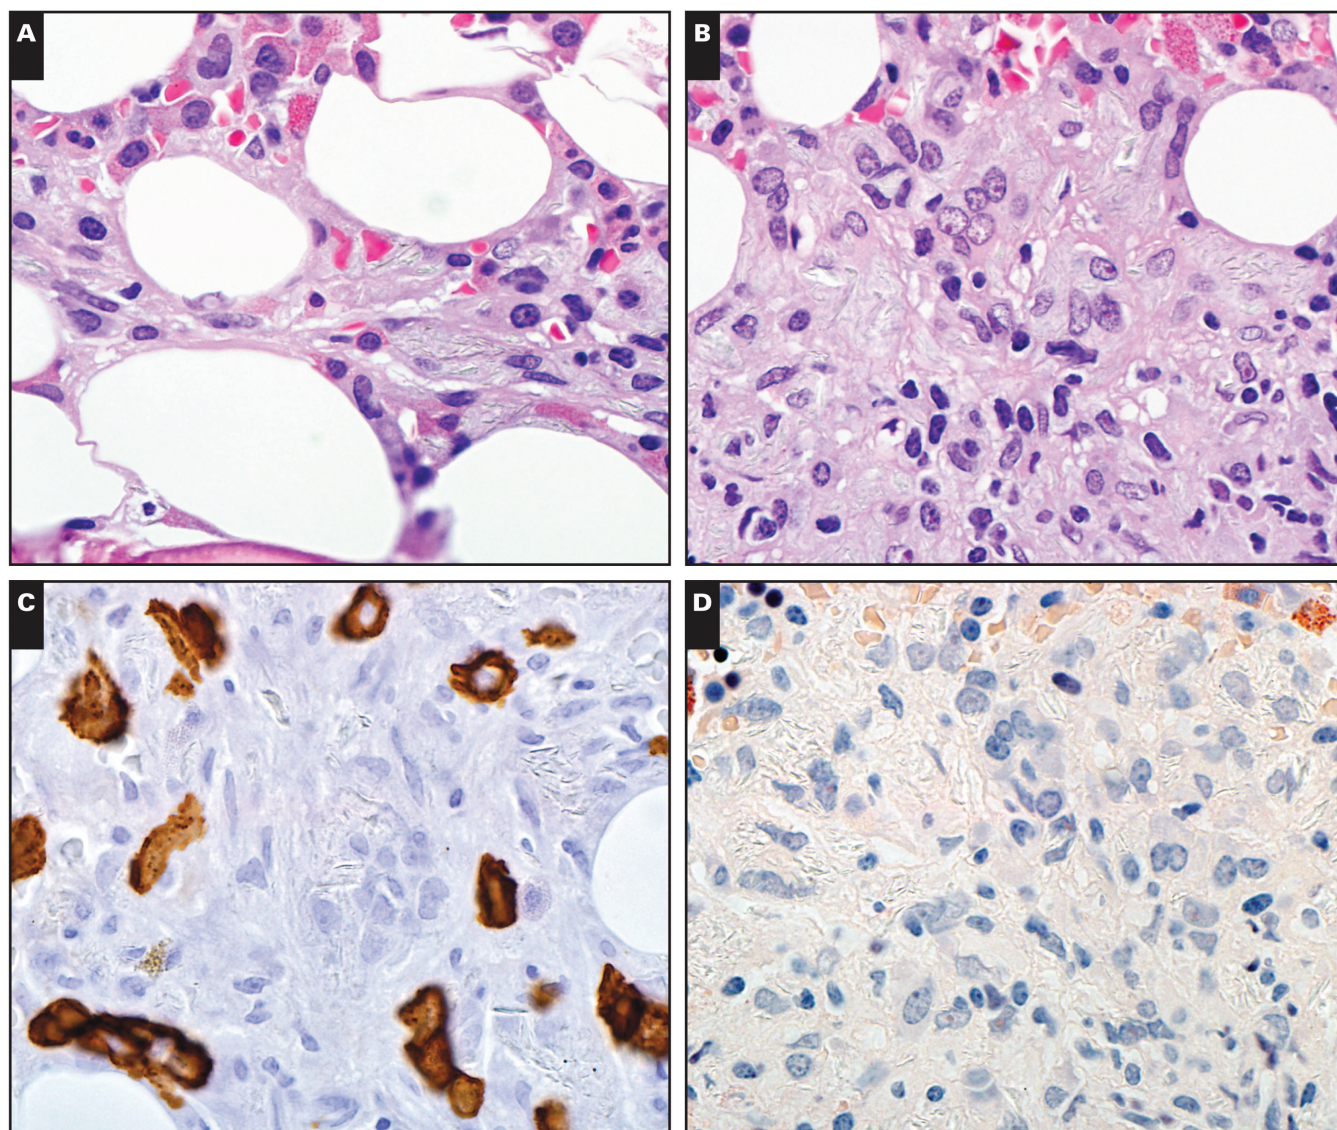

**Image 5** Crystal-storing histiocytosis associated with foreign body granuloma. In the bone marrow core biopsy, the histiocytes form a granuloma with refractory elongated crystals (**A**, H&E, x1,000), or multinucleated giant cell (**B**, H&E, x1,000). CD138-positive plasma cells encircle the outer rim of the granulomas (**C**), while Congo red nicely demonstrates the negatively staining crystalline inclusions in the histiocytes and multinucleated giant cell (**D**, x1,000).

male:female distribution of 14:16 (two cases unknown). Of the BM-CSH cases specifically, the average age of diagnosis is 62 years (range, 35-79 years) with a male predominance (male:female 26:11) (three cases unknown).

## Discussion

BM-CSH is an exceedingly uncommon phenomenon accounting for less than 1% of all BM cases reviewed at our institution over a 5-year period. This may be an underrecognized phenomenon due to occasional subtle histiocytic infiltrates. In keeping with previously published

reports,<sup>4,57</sup> our study shows that BM-CSH is most often associated with a plasma cell neoplasm and essentially all cases involve a  $\kappa$  light chain monoclonal protein without specific heavy chain association. Similar to the observation by Jones et al,<sup>57</sup> we also noted persistent CSH after chemotherapy or BM transplant. In our study, no significant differences on clinical outcome were observed between localized and generalized CSH.

BM-CSH displays strikingly variable histologic appearances with regards to the crystalline appearance, cytoplasmic quality, and histiocytic distribution. The crystalline inclusions in histiocytes range from needle-like, globular, to hexagonal with variability often



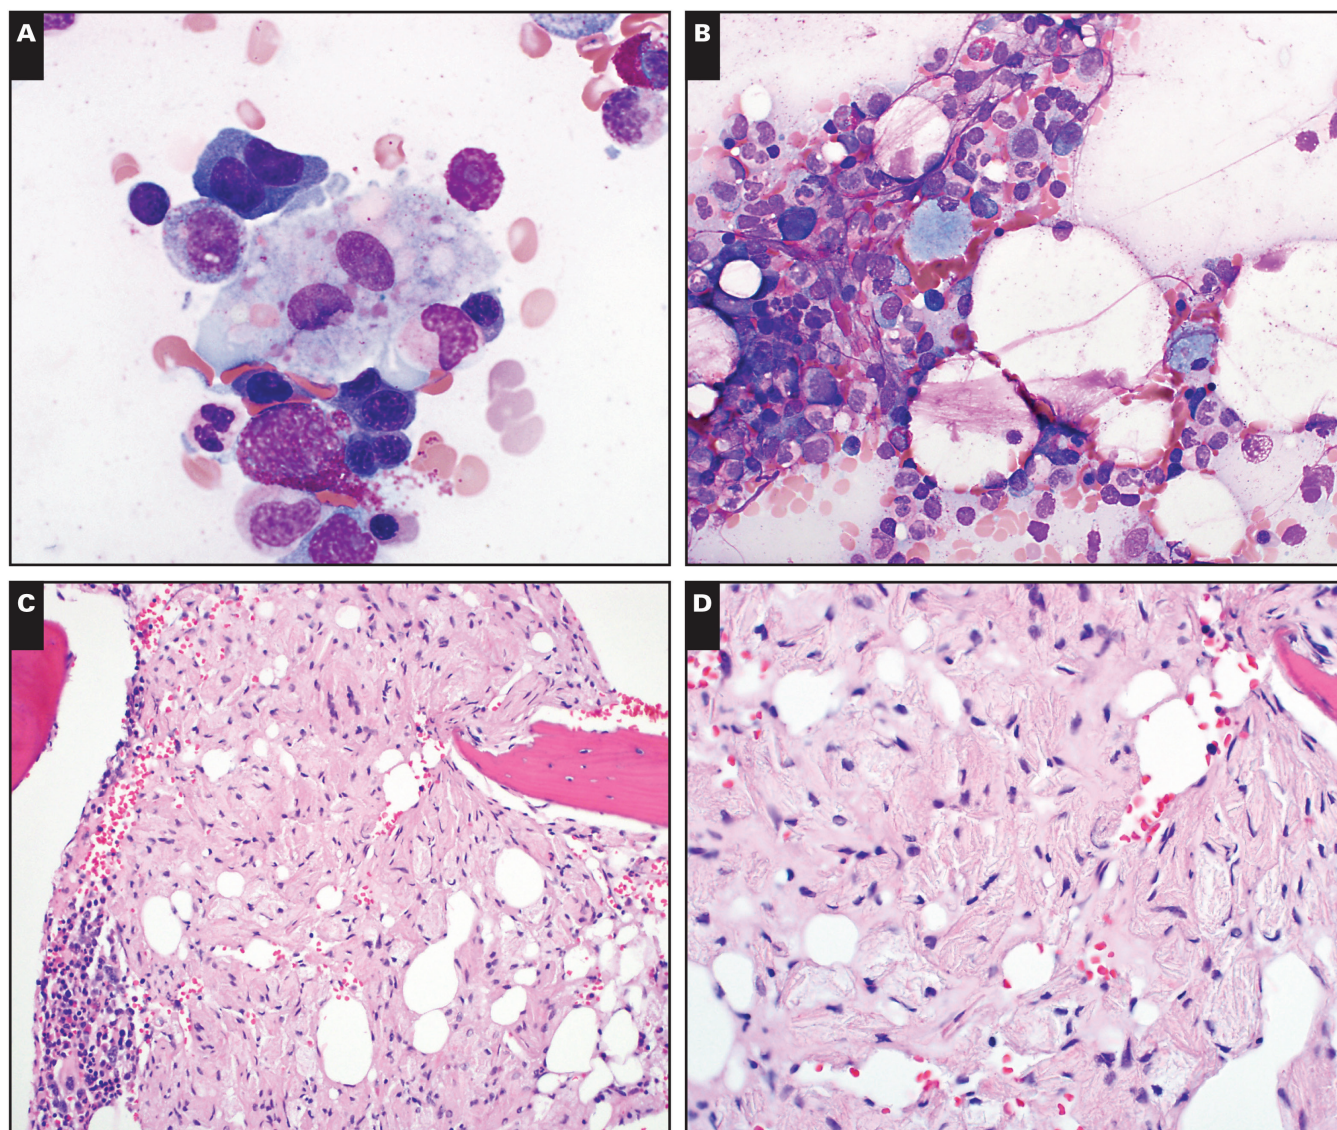

**Image 6** Crystal-storing histiocytosis associated with plasma cell myeloma. The histiocyte cytoplasm was pale with light-colored globules (**A**, Wright-Giemsa, x1,000), or occasional Gaucher-like forms (**B**, Wright-Giemsa, x600). In the biopsy, the histiocytes showed epithelioid granuloma-like distribution (**C**, H&E, x600) and were Gaucher-like with striated cytoplasm (**D**, H&E, x1,000).

occurring within the same case (Images 1-6). The cytoplasmic appearance of involved histiocytes is also notably variable ranging from bland/lightly azurophilic to brightly eosinophilic, globular-like, subtly granular, striated, and even Pseudo-Gaucher-like (Images 1-6). When associated with a clonal plasma cell process, the plasma cells in CSH, in addition to the histiocytes, may also contain cytoplasmic crystals (APL cell-like, or globule-like, or numerous small chunky granules). Based on our case series, the histiocytic infiltrates ranged from less than 10% to over 30% of BM cellularity, with the distribution patterns varying from interstitial to granuloma-like, clusters, or loose aggregates.

Given the diverse appearances of the histiocytes and their infiltration patterns in BM-CSH, careful consideration and evaluation for other potential entities are needed to avoid misinterpretation. Potential morphologic mimickers of CSH in the BM include Gaucher disease (Image 6) or other storage disorders, infectious disease/granulomatous inflammation (Images 2, 5, and 6), hemophagocytic lymphohistiocytosis, and megakaryocytic dysplasia (Image 2). Similarly, pathologists should be aware that an underlying plasma cell neoplasm or B-cell lymphoma could be masked by the histiocytic infiltrates. For example, in case 4, the histiocytic infiltrate was significantly prominent and the relative smaller proportion of clonal plasma cells corresponding to PCM could have been overlooked.

**Table 2**  
**Pathological Characteristics of Eight Cases of BM-CSH**

| Case No. | Cytoplasmic Characteristics of Histiocytes in Aspirate | Crystal Appearance in Aspirate | % Histiocytes in Biopsy | Distribution Pattern of Histiocytes in Core Biopsy | Cytology of Histiocytes in Biopsy                           | % BM by Underlying Neoplasm | Cytogenetics | FISH (Plasma-Cell Related)                                                            |
|----------|--------------------------------------------------------|--------------------------------|-------------------------|----------------------------------------------------|-------------------------------------------------------------|-----------------------------|--------------|---------------------------------------------------------------------------------------|
| 1        | Light blue                                             | Needle-like or globular        | 10-30                   | Interstitial                                       | Lightly eosinophilic                                        | 20                          | Normal       | Normal                                                                                |
| 2        | Sea blue or megakaryocyte-like                         | Globular                       | 30                      | Granuloma-like                                     | Pink smooth cytoplasm                                       | 20                          | Normal       | Positive for <i>CCND1/IGH</i> fusion                                                  |
| 3        | Eosinophilic                                           | Needle-like or globular        | 10-30                   | Loose aggregates                                   | Gaucher-like; striated                                      | 60                          | Normal       | +3, +9, +11, +15                                                                      |
| 4        | Globular or light azurophilic                          | Needle-like                    | >30                     | Aggregates                                         | Pink cytoplasm with hexagonal crystals or Hürthle cell-like | 10                          | Normal       | +7, +9, +13, t( <i>IGH</i> )                                                          |
| 5        | Suboptimal specimen                                    | Suboptimal specimen            | <10                     | Granuloma-like                                     | Needle-like crystal inclusions                              | <5                          | NA           | NA                                                                                    |
| 6        | Pseudo-Gaucher                                         | Globular                       | <10                     | Epithelioid granuloma-like                         | Gaucher-like; striated                                      | 20                          | Normal       | Negative for t(11;14), t(4;14), t(14;16), del (1p), +1q, -13/ del (13q), or del (17p) |
| 7        | Sea blue                                               | Needle-like                    | >30                     | Granuloma-like                                     | Large crystals and multinucleated giant cells               | 5                           | Normal       | NA                                                                                    |
| 8        | Granular                                               | Needle-like                    | <10                     | Interstitial                                       | Pink smooth cytoplasm                                       | 30                          | Normal       | Positive for <i>CCND1/IGH</i> fusion                                                  |

BM, bone marrow; CSH, crystal-storing histiocytosis; FISH, fluorescence in situ hybridization; NA, not available.

The morphologic similarities of CSH with other entities such as Gaucher disease and rhabdomyoma have also been noted by others in the literature. Several studies have elegantly illustrated that pseudo-Gaucher histiocytes in CSH cases resemble true Gaucher disease.<sup>3,48,91</sup> In such situations, iron staining may be a useful method for its diagnosis because pseudo-Gaucher histiocytes are mostly negative for iron staining.<sup>92</sup> The occasional CSH case that may show positive iron staining in histiocytes should not, however, be misinterpreted as Gaucher disease. The unique heterogeneous iron staining pattern, with unstained crystals standing out against a background of strong stained histiocytes, can provide an important feature for the diagnosis of CSH.<sup>27</sup> Similar to Gaucher disease, several research groups have also reported CSH cases mimicking adult rhabdomyoma.<sup>47,49,58</sup> These two entities share similarities in morphology both described as large plump cells with bland oval nuclei and striated, eosinophilic cytoplasm. However, the histiocytes in CSH, in contrast to

rhabdomyoma tumor cells, are positive for CD68 and negative for smooth muscle markers. In these reports, the authors suggest that in the case of adult rhabdomyoma with atypical histologic findings, CSH should be considered and ruled out to prevent a serious misdiagnosis.<sup>47,49,58</sup> Typical locations of adult rhabdomyoma would include the mucosal surface of the oral cavity, larynx and pharynx, and the soft tissues of the neck.

CSH occurs most often in association with an underlying clonal plasma cell or B-cell disorder (76% in our study to 90% in the literature).<sup>1</sup> The slight variation in the percentage of reported cases may stem from increased recognition of this rare entity in recent years. Jones et al<sup>57</sup> suggested that Ig crystal formation by plasma cells was frequently associated with the proliferations of crystal-laden histiocytes. Recent mass spectrometry series<sup>4</sup> confirmed that the histiocytes contained Ig fragments, likely derived from lymphoma or neoplastic plasma cells. The most common non-Ig related CSH was clofazimine crystals found in lepromatous leprosy patients.<sup>5-8</sup> The



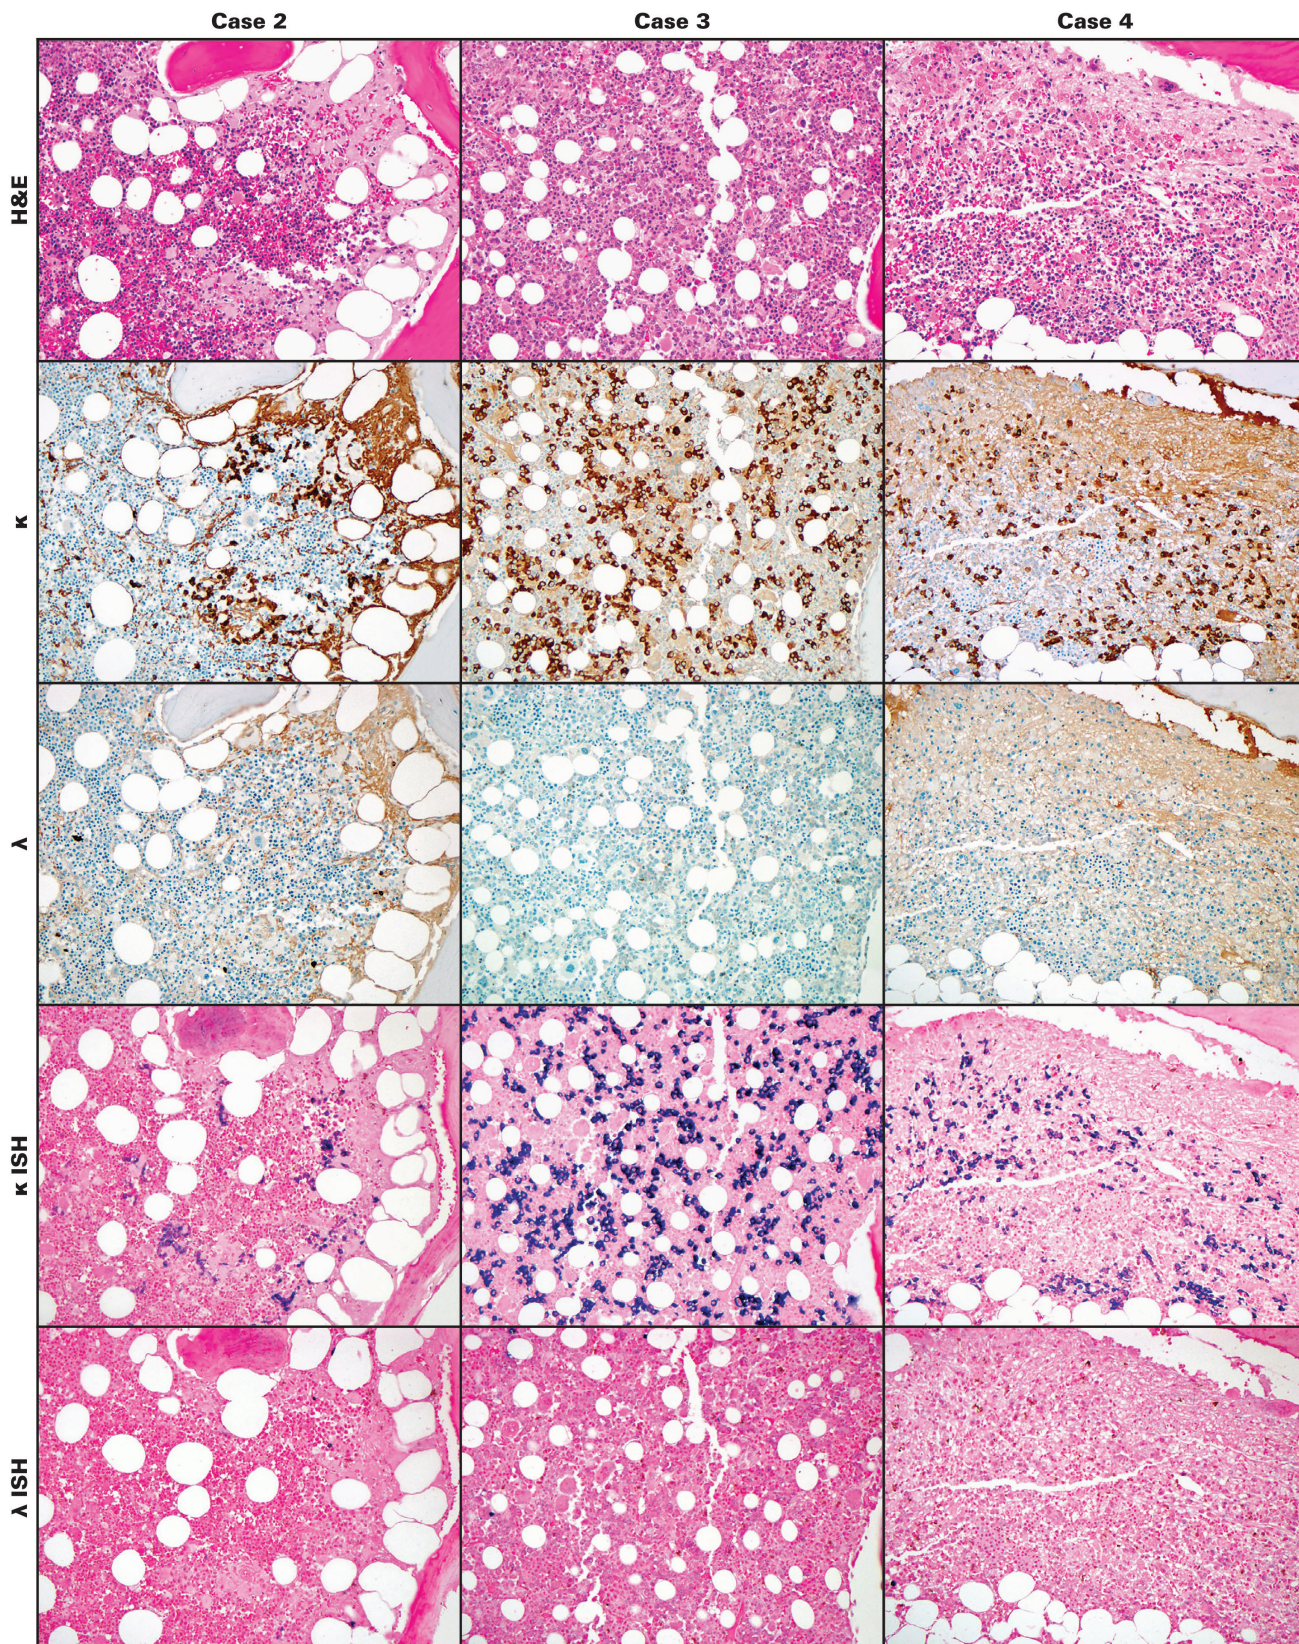

**Image 7** Immunohistochemical and in situ hybridization (ISH) stains for  $\kappa$  and  $\lambda$  in crystal-storing histiocytosis involved with bone marrow. Cases 2 to 4 highlighted the clonal ( $\kappa$ ) plasma cell infiltrates and did not reveal any significant perceptible differences between an immunohistochemical staining technique and ISH (x200).



review by Sukpanichnant et al<sup>7</sup> described additional 14 cases of clofazimine-induced CSH, which were not included in the literature review. Similar to case 2 in our series, Balakrishna's group reported a CSH case with amyloidoid deposition.<sup>11</sup>

In a review of the literature of all CSH cases published since 1987 (Table 4), it is interesting that the largest number of localized and generalized CSH cases, by site, involve the BM (22% and 70%, respectively). Importantly, as a whole, localized CSH cases far outnumber generalized

cases (82% vs 18%; Table 4). Focusing specifically on BM-CSH cases (Table 5), there is a trend of male predominance (26 males vs 11 females), while the CSH cases with other sites of involvement had relatively equal distribution (39 males vs 50 females). Similar to CSH cases as a whole, the majority of BM-CSH cases (38/40, 95%) had an underlying lymphoproliferative or plasma cell disorder (29 plasma cell dyscrasia/neoplasm, two B-cell lymphoma, and seven lymphoplasmacytic lymphoma). The remaining two cases were Fanconi syndrome and systemic mastocytosis. Not surprisingly, the monoclonal spikes in these cases were mostly with  $\kappa$  light chain restriction (28/30, 93%) and a mixed distribution of heavy chains including IgG (16/28, 57%), IgA (8/28, 29%), and IgM (4/28, 14%).

In our case series, we also identified a foreign body granuloma-associated CSH (Image 5), which, to our best knowledge, has never been reported previously. This case had a clinical history of meperidine injection and presented with crystalline materials in histiocytes in multiple sites including skin and liver. Subsequent ultrastructural spectral analyses determined the crystals contained silicone, magnesium, and oxygen, suggesting a silicate. Due to the presence of an IgG  $\kappa$  paraprotein, the patient underwent a BM biopsy, which showed small granulomata and foci of crystal-laden histiocytes with  $\kappa$  light chain-restricted plasma cells in the vicinity of these cells. Although mass spectrometry was not performed in order to confirm an Ig-related

**Table 3**  
Underlying Diagnosis in 131 Cases of CSH Reported in the English Literature From 1987 to 2017 (Including the Current Study)

| Underlying Diagnosis                     | No. of Cases (%) |
|------------------------------------------|------------------|
| CSH with underlying LP-PCD               | 100 (76%)        |
| Plasma cell myeloma                      | 24               |
| Lymphoplasmacytic lymphoma               | 15               |
| MGUS                                     | 13               |
| Plasma cell dyscrasia/neoplasm           | 13               |
| B-cell lymphoma further subclassified as | 35               |
| MALT lymphoma                            | 24               |
| B-cell lymphoma, not classified          | 7                |
| Nodal MZL                                | 2                |
| Splenic MZL                              | 2                |
| CSH without underlying LP-PCD            | 31 (24%)         |

CSH, crystal-storing histiocytosis; LP-PCD, lymphoproliferative or plasma cell disorder; MALT, mucosa-associated lymphoid tissue; MGUS, monoclonal gammopathy of undetermined significance; MZL, marginal zone lymphoma.

**Table 4**  
Localized and Generalized CSH Cases: Site(s) of Disease as Reported in the English Literature from 1987 to 2017 (Including the Current Study)

| Site                   | Localized CSH (Single Site, n = 108) | Generalized CSH (Multiple Site, n = 23) | Total (n = 131) |
|------------------------|--------------------------------------|-----------------------------------------|-----------------|
| Bone marrow            | 24 (22%)                             | 16 (70%)                                | 40 (31%)        |
| Lung and pleura        | 19 (17%)                             | 1 (5%)                                  | 20 (15%)        |
| Kidney                 | 14 (13%)                             | 5 (24%)                                 | 19 (15%)        |
| Lymph node             | 6 (6%)                               | 8 (38%)                                 | 14 (11%)        |
| Gastrointestinal tract | 9 (8%)                               | 5 (24%)                                 | 14 (11%)        |
| Head and neck          | 9 (8%)                               | 4 (19%)                                 | 13 (10%)        |
| Eye/orbit              | 6 (6%)                               | 2 (10%)                                 | 8 (6%)          |
| Skin                   | 6 (6%)                               | 2 (10%)                                 | 8 (6%)          |
| Central nervous system | 6 (6%)                               | 0                                       | 6 (5%)          |
| Breast                 | 4 (4%)                               | 1 (5%)                                  | 5 (4%)          |
| Liver                  | 0                                    | 4 (19%)                                 | 4 (3%)          |
| Spleen                 | 1 (1%)                               | 2 (10%)                                 | 3 (2%)          |
| Body fluid             | 2 (2%)                               | 0                                       | 2 (2%)          |
| Upper back/arm         | 0                                    | 2 (10%)                                 | 2 (2%)          |
| Heart                  | 1 (1%)                               | 0                                       | 1 (1%)          |
| Soft tissue            | 1 (1%)                               | 0                                       | 1 (1%)          |
| Thymus                 | 0                                    | 1 (5%)                                  | 1 (1%)          |
| Esophagus              | 0                                    | 1 (5%)                                  | 1 (1%)          |
| Peritoneum             | 0                                    | 1 (5%)                                  | 1 (1%)          |
| Omentum                | 0                                    | 1 (5%)                                  | 1 (1%)          |

CSH, crystal-storing histiocytosis.

**Table 5**  
**Summary of BM-CSH Reported in the English Literature from 1987 to 2017 (Including the Current Study)**

| Author (Year)                               | No. of BM-CSH Cases | Male/Female | Underlying Diagnosis (PCN/B-Cell Lymphoma/LPL) | M-Spike (Heavy Chain/Light Chain)                                 | No. of Localized/ Generalized CSH Cases |
|---------------------------------------------|---------------------|-------------|------------------------------------------------|-------------------------------------------------------------------|-----------------------------------------|
| Takahashi et al <sup>67</sup> (1987)        | 1                   | Unknown     | 1/0/0                                          | IgA κ                                                             | 1/0                                     |
| Jones et al <sup>57</sup> (1999)            | 10                  | 7/3         | 5/0/5                                          | IgA (2/6); IgM (1/6); IgG (1/6); biclonal (2/6); κ (3/4); λ (1/4) | 5/5                                     |
| Lebeau et al <sup>60</sup> (2002)           | 1                   | 1/0         | 1/0/0                                          | IgA κ                                                             | 1/0                                     |
| Papla et al <sup>62</sup> (2004)            | 1                   | 1/0         | 1/0/0                                          | IgG κ                                                             | 0/1                                     |
| Zioni et al <sup>71</sup> (2004)            | 1                   | Unknown     | 1/0/0                                          | Unknown                                                           | 1/0                                     |
| de Lastours et al <sup>37</sup> (2006)      | 2                   | 1/1         | 2/0/0                                          | IgG (1/2); IgA (1/2); κ (2/2)                                     | 0/2                                     |
| Keane and Gill <sup>42</sup> (2008)         | 1                   | 1/0         | 1/0/0                                          | Unknown/κ                                                         | 1/0                                     |
| Kar et al <sup>41</sup> (2008)              | 1                   | 1/0         | 1/0/0                                          | IgG κ                                                             | 1/0                                     |
| Farooq et al <sup>38</sup> (2009)           | 1                   | 1/0         | 1/0/0                                          | IgG κ                                                             | 0/1                                     |
| Alayed et al <sup>19</sup> (2010)           | 1                   | Unknown     | 0/0/0 <sup>a</sup>                             | Unknown                                                           | 1/0                                     |
| Park et al <sup>48</sup> (2010)             | 1                   | 1/0         | 1/0/0                                          | No apparent monoclonal protein/κ                                  | 1/0                                     |
| Hu et al <sup>26</sup> (2012)               | 1                   | 0/1         | 1/0/0                                          | IgG κ                                                             | 1/0                                     |
| Duquesne et al <sup>2</sup> (2013)          | 1                   | 0/1         | 0/0/0 <sup>b</sup>                             | IgG κ                                                             | 0/1                                     |
| Miura et al <sup>27</sup> (2013)            | 1                   | 0/1         | 1/0/0                                          | No apparent monoclonal protein                                    | 1/0                                     |
| Lee et al <sup>19</sup> (2015)              | 1                   | 0/1         | 1/0/0                                          | IgA κ                                                             | 1/0                                     |
| Baird et al <sup>18</sup> (2015)            | 1                   | 0/1         | 0/0/1                                          | IgM λ                                                             | 0/1                                     |
| Aline-Fardin et al <sup>17</sup> (2015)     | 1                   | 1/0         | 0/1/0                                          | IgG κ                                                             | 0/1                                     |
| Kanagal-Shamanna et al <sup>6</sup> (2016)  | 4                   | 3/1         | 3/0/1                                          | IgG (2/4); IgA (1/4); IgM (1/4); κ (4/4)                          | 3/1                                     |
| Uthamalingam and Mehta <sup>14</sup> (2017) | 1                   | 1/0         | 1/0/0                                          | IgG/κ                                                             | 1/0                                     |
| Current study                               | 8                   | 7/1         | 7 <sup>c</sup> /1/0                            | IgG (5/7); IgA (1/7); IgM (1/7); κ (7/7)                          | 5/3                                     |

BM, bone marrow; CSH, crystal-storing histiocytosis; Ig, immunoglobulin; LPL, lymphoplasmacytic lymphoma; PCN, plasma cell dyscrasia/neoplasm.

<sup>a</sup>Systemic mastocytosis.

<sup>b</sup>Fanconi syndrome.

<sup>c</sup>One case with systemic amyloidosis with myeloma.

CSH in BM, clinically there were features to suggest both κ light chain–related CSH and a foreign body granuloma-associated CSH.

In summary, we report eight cases of BM-CSH in conjunction with a review of the published literature. This study identifies and confirms the unique nature of this disorder in the bone marrow. BM-CSH appears to be quite a rare entity overall, has a clear-cut association with an underlying clonal disorder involving plasma cells, is strongly associated with κ light chain monoclonal protein, is less commonly composed of nonimmunoglobulin crystals, and may, on occasion, exhibit a morphologic appearance that could be initially mistaken for an alternative disorder. Given that BM-CSH is an uncommon phenomenon, we speculate if it is possibly also under-recognized due to resemblance to other entities. BM-CSH

exhibits a wide morphologic spectrum with respect to the appearance of histiocytes and crystals. Importantly, given that this is an uncommon finding, careful evaluation and exclusion of potential mimickers such as dysplastic megakaryocytes and granulomatous inflammation is essential. Awareness of the morphologic diversity of CSH will enable recognition of this entity and reaching the correct diagnosis. Early detection of CSH could be the first clue to unveiling the presence of an underlying clonal plasma cell or B-cell disorder and will optimize patient diagnosis and management.

Corresponding author: Kaaren K. Reichard, MD, Dept of Laboratory Medicine and Pathology, Mayo Clinic, 200 First St SW, Rochester, MN 55905; [reichard.kaaren@mayo.edu](mailto:reichard.kaaren@mayo.edu).



## References

- Dogan S, Barnes L, Cruz-Vetrano WP. Crystal-storing histiocytosis: report of a case, review of the literature (80 cases) and a proposed classification. *Head Neck Pathol*. 2012;6:111-120.
- Duquesne A, Werbrouck A, Fabiani B, et al. Complete remission of monoclonal gammopathy with ocular and periorbital crystal storing histiocytosis and Fanconi syndrome. *Hum Pathol*. 2013;44:927-933.
- El Hamel C, Thierry A, Trouillas P, et al. Crystal-storing histiocytosis with renal Fanconi syndrome: pathological and molecular characteristics compared with classical myeloma-associated Fanconi syndrome. *Nephrol Dial Transplant*. 2010;25:2982-2990.
- Kanagal-Shamanna R, Xu-Monette ZY, Miranda RN, et al. Crystal-storing histiocytosis: a clinicopathological study of 13 cases. *Histopathology*. 2016;68:482-491.
- Pais AV, Pereira S, Garg I, et al. Intra-abdominal, crystal-storing histiocytosis due to clofazimine in a patient with lepromatous leprosy and concurrent carcinoma of the colon. *Lepr Rev*. 2004;75:171-176.
- Singh H, Azad K, Kaur K. Clofazimine-induced enteropathy in a patient of leprosy. *Indian J Pharmacol*. 2013;45:197-198.
- Sukpanichnant S, Hargrove NS, Kachintorn U, et al. Clofazimine-induced crystal-storing histiocytosis producing chronic abdominal pain in a leprosy patient. *Am J Surg Pathol*. 2000;24:129-135.
- Szeto W, Garcia-Buitrago MT, Abbo L, et al. Clofazimine enteropathy: a rare and underrecognized complication of mycobacterial therapy. *Open Forum Infect Dis*. 2016;3:ofw004.
- Alayed KM, Alabdulaali MK, Alkhairy KS, et al. Aggressive systemic mastocytosis with Charcot-Leyden crystals-associated crystal storing histiocytosis in bone marrow. *Pathology*. 2010;42:85-87.
- Lewis JT, Candelora JN, Hogan RB, et al. Crystal-storing histiocytosis due to massive accumulation of Charcot-Leyden crystals: a unique association producing colonic polyposis in a 78-year-old woman with eosinophilic colitis. *Am J Surg Pathol*. 2007;31:481-485.
- Balakrishna J, Chen A, Urken M. Crystal storing histiocytosis clinically mimicking metastatic carcinoma: report of a case and reviews of literature. *Head Neck*. 2016;38:E95-E98.
- Swerdlow SH, Campo E, Pileri SA, et al. The 2016 revision of the World Health Organization classification of lymphoid neoplasms. *Blood*. 2016;127:2375-2390.
- Kokuho N, Terasaki Y, Kunugi S, et al. Localized pulmonary crystal-storing histiocytosis complicating pulmonary mucosa-associated lymphoid tissue lymphoma presenting with multiple mass lesions. *Hum Pathol*. 2017;65:180-186.
- Uthamalingam P, Mehta S. Crystal-storing histiocytosis. *Int J Surg Pathol*. 2017;1066896917696746.
- Wu CK, Yang AH, Lai HC, et al. Combined proximal tubulopathy, crystal-storing histiocytosis, and cast nephropathy in a patient with light chain multiple myeloma. *Bmc Nephrol*. 2017;18:170.
- Nagaharu K, Kageyama Y, Watanabe T, et al. Solitary pulmonary MALT lymphoma presenting crystal-storing histiocytosis. *Rinsho Ketsueki*. 2016;57:1032-1037.
- Aline-Fardin A, Bender S, Fabiani B, et al. Pseudo-peritoneal carcinomatosis presentation of a crystal-storing histiocytosis with an unmutated monoclonal  $\kappa$  light chain. *Medicine (Baltimore)*. 2015;94:e1247.
- Baird SM, Kenealy MK, Hoy R. Complete remission of Waldenström's associated generalized crystal-storing histiocytosis of IgM lambda subtype with bortezomib-based combination chemotherapy. *Leuk Lymphoma*. 2015;56:3233-3235.
- Lee JS, Im K, Park SN, et al. A challenging diagnosis: crystal-storing histiocytosis in plasma cell myeloma. *Am J Clin Pathol*. 2015;143:300-304.
- Li JJ, Henderson C. Cutaneous crystal storing histiocytosis: a report of two cases. *J Cutan Pathol*. 2015;42:136-143.
- Loghavi S, Khoury JD. Unusual breast mass: lymphoma with crystal-storing histiocytosis. *Blood*. 2015;125:2445.
- Mittal R, Damato B, Coupland SE. Conjunctival extranodal marginal zone B-cell lymphoma with crystal-storing histiocytosis. *Acta Ophthalmol*. 2015;93:e602-e603.
- Saluja K, Thakral B, Eldibany M, et al. Crystal storing histiocytosis associated with marginal zone B-cell lymphoma: a rare initial clinical presentation diagnosed by fine-needle aspiration. *Cytojournal*. 2014;11:17.
- Watanabe H, Osawa Y, Goto S, et al. A case of endocapillary proliferative glomerulonephritis with macrophages phagocytosing monoclonal immunoglobulin lambda light chain. *Pathol Int*. 2015;65:38-42.
- Costanzi C, Bourdette D, Parisi JE, et al. Crystal-storing histiocytosis: an unusual relapsing inflammatory CNS disorder. *Mult Scler Relat Disord*. 2012;1:95-99.
- Hu X, Liu J, Bai C, et al. Bortezomib combined with thalidomide and dexamethasone is effective for patient with crystal-storing histiocytosis associated with monoclonal gammopathy of undermined significance. *Eur J Haematol*. 2012;89:183-184.
- Miura TE, Takihi IY, Maekawa YH, et al. Iron staining in gammopathy-related crystal-storing histiocytosis: a misleading feature to the differential diagnosis with Gaucher's disease. *Mol Genet Metab*. 2013;110:414-415.
- Orr BA, Gallia GL, Dogan A, et al. IgA/kappa-restricted crystal storing histiocytosis involving the central nervous system characterized by proteomic analysis. *Clin Neuropathol*. 2014;33:23-28.
- Radhakrishnan S, Maneksha V, Adulkar N. Crystal-storing histiocytosis masquerading ocular adnexal lymphoma: a case report and review of literature. *Ophthalm Plast Reconstr Surg*. 2014;30:e67-e69.
- Rossi G, De Rosa N, Cavazza A, et al. Localized pleuropulmonary crystal-storing histiocytosis: 5 cases of a rare histiocytic disorder with variable clinicoradiologic features. *Am J Surg Pathol*. 2013;37:906-912.
- Tahara K, Miyajima K, Ono M, et al. Crystal-storing histiocytosis associated with marginal-zone lymphoma. *Jpn J Radiol*. 2014;32:296-301.
- Thakral B, Courville E. Crystal-storing histiocytosis with IgD  $\kappa$ -associated plasma cell neoplasm. *Blood*. 2014;123:3540.
- Yu SC, Yao M, Liao SL. Crystal-storing histiocytosis in a patient with ocular extranodal marginal zone lymphoma. *Br J Haematol*. 2013;160:419.
- Zardawi IM, Szabo F. Monoclonal plasma cell proliferation associated with crystal-storing histiocytosis on a background of plasmacytoid dendritic cell tumour in a patient with stable chronic myelomonocytic leukaemia. *Histopathology*. 2013;62:967-972.
- Zhang C, Myers JL. Crystal-storing histiocytosis complicating primary pulmonary marginal zone lymphoma of mucosa-associated lymphoid tissue. *Arch Pathol Lab Med*. 2013;137:1199-1204.

36. de Alba Campomanes AG, Rutar T, Crawford JB, et al. Crystal-storing histiocytosis and crystalline keratopathy caused by monoclonal gammopathy of undetermined significance. *Cornea*. 2009;28:1081-1084.
37. de Lastours V, Papo T, Cazals-Hatem D, et al. Bone involvement in generalized crystal-storing histiocytosis. *J Rheumatol*. 2006;33:2354-2358.
38. Farooq U, Bayerl MG, Abendroth CS, et al. Renal crystal storing histiocytosis in a patient with multiple myeloma. *Ann Hematol*. 2009;88:807-809.
39. Galed-Placed I. Immunoglobulin crystal-storing histiocytosis in a pleural effusion from a woman with IgA kappa multiple myeloma: a case report. *Acta Cytol*. 2006;50:539-541.
40. Gao FF, Khalbuss WE, Austin RM, et al. Cytomorphology of crystal storing histiocytosis in the breast associated with lymphoma: a case report. *Acta Cytol*. 2011;55:302-306.
41. Kar R, Dutta S, Bhargava R, et al. Crystal storing histiocytosis: a rare presentation of plasma cell myeloma. *Indian J Hematol Blood Transfus*. 2008;24:63-66.
42. Keane C, Gill D. Multi-organ involvement with crystal-storing histiocytosis. *Br J Haematol*. 2008;141:750.
43. Khurram SA, McPhaden A, Hislop WS, et al. Crystal storing histiocytosis of the tongue as the initial presentation of multiple myeloma. *Oral Surg Oral Med Oral Pathol Oral Radiol Endod*. 2011;111:494-496.
44. Ko HM, da Cunha Santos G, Boerner SL, et al. Negative images of crystalline immunoglobulin in crystal storing histiocytosis: a potential cytologic mimic of mycobacteria in smears. *Diagn Cytopathol*. 2012;40:916-919.
45. Kusakabe T, Watanabe K, Mori T, et al. Crystal-storing histiocytosis associated with MALT lymphoma of the ocular adnexa: a case report with review of literature. *Virchows Arch*. 2007;450:103-108.
46. Lesesve JF, Bronowicki JP, Galed-Placed I. Crystal-storing histiocytosis in ascites from a patient with IgM kappa lymphoplasmacytic lymphoma. *Cytopathology*. 2011;22:207-208.
47. Li ZS, Li PF, Wang Z, et al. Primary extranodal soft-tissue B-cell lymphoma with abundant immunoglobulin inclusions mimicking adult rhabdomyoma: a case report. *J Med Case Rep*. 2011;5:53.
48. Park SH, Ahn JY, Seo YH, et al. [A case of non-secretory myeloma with crystal-storing histiocytosis]. *Korean J Lab Med*. 2010;30:580-584.
49. Pock L, Stuchlik D, Hercogová J. Crystal storing histiocytosis of the skin associated with multiple myeloma. *Int J Dermatol*. 2006;45:1408-1411.
50. Rodriguez FJ, Gamez JD, Vrana JA, et al. Immunoglobulin derived depositions in the nervous system: novel mass spectrometry application for protein characterization in formalin-fixed tissues. *Lab Invest*. 2008;88:1024-1037.
51. Rossi G, Morandi U, Nannini N, et al. Crystal-storing histiocytosis presenting with pleural disease. *Histopathology*. 2010;56:403-405.
52. Todd WU, Drabick JJ, Benninghoff MG, et al. Pulmonary crystal-storing histiocytosis diagnosed by computed tomography-guided fine-needle aspiration. *Diagn Cytopathol*. 2010;38:274-278.
53. Weichman K, Dember LM, Prokaveva T, et al. Clinical and molecular characteristics of patients with non-amyloid light chain deposition disorders, and outcome following treatment with high-dose melphalan and autologous stem cell transplantation. *Bone Marrow Transplant*. 2006;38:339-343.
54. Fairweather PM, Williamson R, Tsikleas G. Pulmonary extranodal marginal zone lymphoma with massive crystal storing histiocytosis. *Am J Surg Pathol*. 2006;30:262-267.
55. Friedman MT, Molho L, Valderrama E, et al. Crystal-storing histiocytosis associated with a lymphoplasmacytic neoplasm mimicking adult rhabdomyoma: a case report and review of the literature. *Arch Pathol Lab Med*. 1996;120:1133-1136.
56. Harada M, Shimada M, Fukayama M, et al. Crystal-storing histiocytosis associated with lymphoplasmacytic lymphoma mimicking Weber-Christian disease: immunohistochemical, ultrastructural, and gene-rearrangement studies. *Hum Pathol*. 1996;27:84-87.
57. Jones D, Bhatia VK, Krausz T, et al. Crystal-storing histiocytosis: a disorder occurring in plasmacytic tumors expressing immunoglobulin kappa light chain. *Hum Pathol*. 1999;30:1441-1448.
58. Kapadia SB, Enzinger FM, Heffner DK, et al. Crystal-storing histiocytosis associated with lymphoplasmacytic neoplasms: report of three cases mimicking adult rhabdomyoma. *Am J Surg Pathol*. 1993;17:461-467.
59. Kaufmann O, Hansen A, Deicke P, et al. Subcutaneous crystal-storing histiocytosis associated with lymphoplasmacytic lymphoma (immunocytoma). *Pathol Res Pract*. 1996;192:1148-1151.
60. Lebeau A, Zeindl-Eberhart E, Müller EC, et al. Generalized crystal-storing histiocytosis associated with monoclonal gammopathy: molecular analysis of a disorder with rapid clinical course and review of the literature. *Blood*. 2002;100:1817-1827.
61. Llobet M, Castro P, Barceló C, et al. Massive crystal-storing histiocytosis associated with low-grade malignant B-cell lymphoma of MALT-type of the parotid gland. *Diagn Cytopathol*. 1997;17:148-152.
62. Papla B, Spólnik P, Rzenno E, et al. Generalized crystal-storing histiocytosis as a presentation of multiple myeloma: a case with a possible pro-aggregation defect in the immunoglobulin heavy chain. *Virchows Arch*. 2004;445:83-89.
63. Prasad ML, Charney DA, Sarlin J, et al. Pulmonary immunocytoma with massive crystal storing histiocytosis: a case report with review of literature. *Am J Surg Pathol*. 1998;22:1148-1153.
64. Sethi S, Cuiffo BP, Pinkus GS, et al. Crystal-storing histiocytosis involving the kidney in a low-grade B-cell lymphoproliferative disorder. *Am J Kidney Dis*. 2002;39:183-188.
65. Stokes MB, Aronoff B, Siegel D, et al. Dysproteinemia-related nephropathy associated with crystal-storing histiocytosis. *Kidney Int*. 2006;70:597-602.
66. Sun Y, Tawfikul B, Valderrama E, et al. Pulmonary crystal-storing histiocytosis and extranodal marginal zone B-cell lymphoma associated with a fibroleiomyomatous hamartoma. *Ann Diagn Pathol*. 2003;7:47-53.
67. Takahashi K, Naito M, Takatsuki K, et al. Multiple myeloma, IgA kappa type, accompanying crystal-storing histiocytosis and amyloidosis. *Acta Pathol Jpn*. 1987;37:141-154.
68. Tholouli E, Krebs M, Reeve R, et al. Crystal-storing histiocytosis in a patient with IgG kappa multiple myeloma. *Br J Haematol*. 2005;128:412.
69. Thorson P, Hess JL. Transformation of monocytoid B-cell lymphoma to large cell lymphoma associated with crystal-storing histiocytes. *Arch Pathol Lab Med*. 2000;124:460-462.
70. Yamamoto T, Hishida A, Honda N, et al. Crystal-storing histiocytosis and crystalline tissue deposition in multiple myeloma. *Arch Pathol Lab Med*. 1991;115:351-354.

71. Zioni F, Giovanardi P, Bozzoli M, et al. Massive bone marrow crystal-storing histiocytosis in a patient with IgA-lambda multiple myeloma and extensive extramedullary disease: a case report. *Tumori*. 2004;90:348-351.
72. Bosman C, Camassei FD, Boldrini R, et al. Solitary crystal-storing histiocytosis of the tongue in a patient with rheumatoid arthritis and polyclonal hypergammaglobulinemia. *Arch Pathol Lab Med*. 1998;122:920-924.
73. Chaudhary S, Navarro M, Laser J, et al. Localized crystal-storing histiocytosis presenting as a breast nodule: an unusual presentation of a rare entity. *Breast J*. 2014;20:539-542.
74. Coupland SE, Foss HD, Hummel M, et al. Extranodal marginal zone B-cell lymphoma of the lacrimal gland associated with crystal-storing histiocytosis. *Ophthalmology*. 2002;109:105-110.
75. da Cruz Perez DE, Silva-Sousa YT, de Andrade BA, et al. Crystal-storing histiocytosis: a rare lesion in periapical pathology. *Ann Diagn Pathol*. 2012;16:527-531.
76. Garcia JF, Sánchez E, Lloret E, et al. Crystal-storing histiocytosis and immunocytoma associated with multifocal fibrosclerosis. *Histopathology*. 1998;33:459-464.
77. Ionescu DN, Pierson DM, Qing G, et al. Pulmonary crystal-storing histiocytoma. *Arch Pathol Lab Med*. 2005;129:1159-1163.
78. Isono Y, Baba Y, Tanaka H, et al. A case of gastric crystal-storing histiocytosis. *Nihon Shokakibyo Gakkai Zasshi*. 2016;113:968-974.
79. Johnson M, Mazariegos J, Lewis PJ, et al. Crystal storing histiocytosis presenting as a temporal lobe mass lesion. *Surg Neurol Int*. 2013;4:112.
80. Jones D, Renshaw AA. Recurrent crystal-storing histiocytosis of the lung in a patient without a clonal lymphoproliferative disorder. *Arch Pathol Lab Med*. 1996;120:978-980.
81. Joo M, Kwak JE, Chang SH, et al. Localized gastric crystal-storing histiocytosis. *Histopathology*. 2007;51:116-119.
82. Kaminsky IA, Wang AM, Olsen J, et al. Central nervous system crystal-storing histiocytosis: neuroimaging, neuropathology, and literature review. *AJNR Am J Neuroradiol*. 2011;32:E26-E28.
83. Kawano N, Beppu K, Oyama M, et al. Successful surgical treatment for pulmonary crystal-storing histiocytosis following the onset of gastric non-Hodgkin lymphoma. *J Clin Exp Hematop*. 2013;53:241-245.
84. Lee WS, Kim SR, Moon H, et al. Pulmonary crystal-storing histiocytoma in a patient without a lymphoproliferative disorder. *Am J Med Sci*. 2009;338:421-424.
85. Pitman SD, Wang J, Serros ER, et al. A 70-year-old woman with acute renal failure: crystal-storing histiocytosis. *Arch Pathol Lab Med*. 2006;130:1077-1078.
86. Sailey CJ, Alexiev BA, Gammie JS, et al. Crystal-storing histiocytosis as a cause of symptomatic cardiac mass. *Arch Pathol Lab Med*. 2009;133:1861-1864.
87. Vaid A, Caradine KD, Lai KK, et al. Isolated gastric crystal-storing histiocytosis: a rare marker of occult lymphoproliferative disorders. *J Clin Pathol*. 2014;67:740-741.
88. Woehrer A, Kovacs GG. Clinical neuropathology image 1-2015: crystal-storing histiocytosis of the central nervous system. *Clin Neuropathol*. 2015;34:4-5.
89. Yano Y, Nagahama T, Matsui T, et al. Gastric crystal-storing histiocytosis detected with asymptomatic Sjögren's syndrome: report of a case and summary. *Clin J Gastroenterol*. 2013;6:237-242.
90. Shah S, Sethi S, Arend L, et al. Crystal-storing histiocytosis. *Kidney Int*. 2016;89:507.
91. Schaefer HE. Gammopathy-related crystal-storing histiocytosis, pseudo- and pseudo-pseudo-Gaucher cells: critical commentary and mini-review. *Pathol Res Pract*. 1996;192:1152-1162.
92. Weisberger J, Emmons F, Gorczyca W. Cytochemical diagnosis of Gaucher's disease by iron stain. *Br J Haematol*. 2004;124:696.



# First and Only FDA Cleared Digital Cytology System

**Genius™ Cervical AI**

**Genius™ Review Station**

**Genius™ Digital Imager**

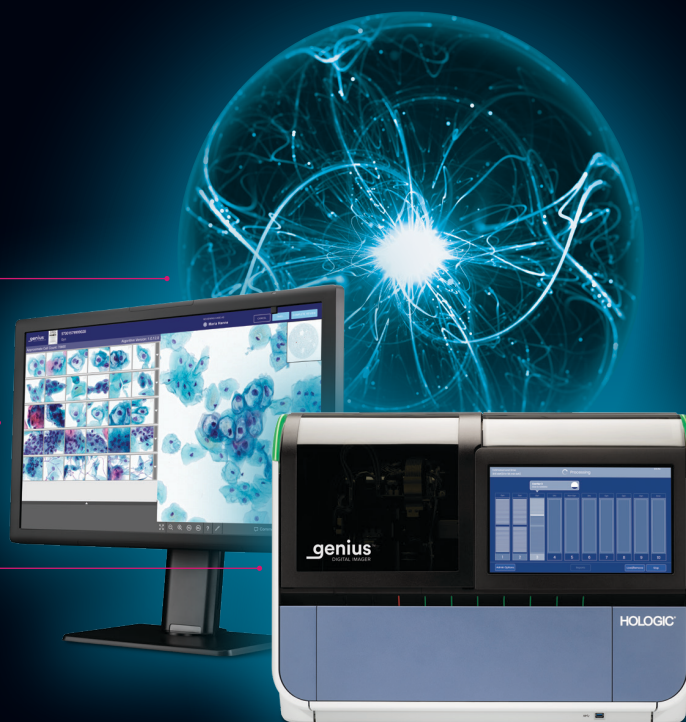

## Empower Your Genius With Ours

**Make a Greater Impact on Cervical Cancer**  
with the Advanced Technology of the  
Genius™ Digital Diagnostics System

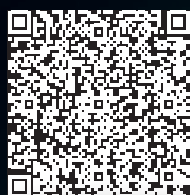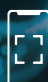

**Click or Scan**  
to discover more

ADS-04159-001 Rev 001 © 2024 Hologic, Inc. All rights reserved. Hologic, Genius, and associated logos are trademarks and/or registered trademarks of Hologic, Inc. and/or its subsidiaries in the United States and/or other countries. This information is intended for medical professionals in the U.S. and other markets and is not intended as a product solicitation or promotion where such activities are prohibited. Because Hologic materials are distributed through websites, podcasts and tradeshows, it is not always possible to control where such materials appear. For specific information on what products are available for sale in a particular country, please contact your Hologic representative or write to [diagnostic.solutions@hologic.com](mailto:diagnostic.solutions@hologic.com).

**genius™**  
DIGITAL DIAGNOSTICS
